# Supplementary material for: Virome analysis of ticks in Zhoushan Archipelago, China
Source: PubMed Central journal article supplement — J Vet Med Sci. 2022 May 17;84(6):847–54. doi: 10.1292/jvms.22-0058 (PMC9246684; doi:10.1292/jvms.22-0058), 2022-05-17
Supplement: jvms-84-847-s001.pdf [file jvms-84-847-s001.pdf]

Supplementary Table 1. Primer sequences used for virus screening and tick species identification

| Virus                                   | Primer Sequence (from 5' to 3')                                                                          |
|-----------------------------------------|----------------------------------------------------------------------------------------------------------|
| 16S rRNA for tick species               | F:CTGCTCAATGATTTTTTAAATTGCTGTGG<br>R:CCGGTCTGAACTCAGATCAAGT                                              |
| Archaeal BJ1 virus                      | F:ACGTCGCCGCCCTGTCGCT<br>R:TACGGGCTCGAGGAGGAC                                                            |
| Moloney murine sarcoma virus            | F:GGCAACTGTCGACTCTGGAT<br>R:AGCATAATCCATTGTCGAGG                                                         |
| Murine leukemia virus                   | F:CCAAGAAAGCCCAAATTTGC<br>R:TGCTGCAGTTAGAGGAGCG                                                          |
| Rabies lyssavirus                       | F:CAAGACCTTGATGGAGGCTG<br>R:AGAGAACCCAAATCCACCAG                                                         |
| Human mastadenovirus C                  | F:CTGTGGAGCGGAGGTTGTA<br>R:CTTTATGCGGTCTTAGAGATC                                                         |
| Enterovirus A71                         | F1:CTGTGCAAGTTCCAACCG<br>R1:GCCCCTGGTCTGTTTGAAC<br>F2:CGCCACGGAAGCTAAAAG<br>R2:CGTGGGAGGACTGCTAAGC       |
| SFTSV                                   | F1:GACCTCGTTGAATGCTCTTG<br>R1:GGTCAAGAGGATGGGCAAG<br>F2:AGAGGCTTACGCAATGAGG<br>R2:CACTGTATGAGCCATCTGTC   |
| Betapapillomavirus 1                    | F1:GATGGTGACCCTGATAATGC<br>R1:CACTGCGGGAGGTCTTGGAG<br>F2:CGCAGTGCCCAACGGTCAC<br>R2:CCTCCAGTAACCGTCCAAGTC |
| Hepatitis B virus                       | F1:CCTCTGCCTAATCATCTCATG<br>R1:CTGGATGCTGGGTCTTCC<br>F2:CACGGTGGTCTCCATGCG<br>R2:CATGAGATGATTAGGCAGAGG   |
| California encephalitis orthobunyavirus | F:TGATGTTGCATCTACCGGTG<br>R:CTGTAAATGCCAATTGTC                                                           |
| Human betaherpesvirus 5                 | F1:CGACATTTTGGAAAGTCCCG<br>R1:CGGTAAATGGCCCGCCTGGC<br>F2:CACCATGGTAATAGCGATG<br>R2:GCCATTAGCCATATTATTC   |
| Dabieshan virus                         | F:GATCATAGAGGAGGAGGA<br>R:GAGGCTGGAAGTATAGTGCA                                                           |
| DSP4 virus                              | F:GCCTGAGGAGAGAATCGTTCA<br>R:GTCTCTATGAAGGACAGTCCC                                                       |
| ZSP7 virus                              | F:ACGCTCTTCCGATCTCCCAGC<br>R:GCCTCCATTGCCCTCAAAG                                                         |
